# Supplementary material for: Longitudinal randomised controlled trials in rehabilitation post-stroke: a systematic review on the quality of reporting and use of baseline outcome values
Source: Springer Nature journal article supplement (doi:10.1186/s12883-015-0344-y), 2015-06-30
Supplement: MOESM1 [file 9742378]

## MEDLINE

| RCT                                             | Review                          | Functioning          | Bereich                                                                  | Reha                                                 |
|-------------------------------------------------|---------------------------------|----------------------|--------------------------------------------------------------------------|------------------------------------------------------|
| Randomized Controlled Trial" [Publication Type] | NOT "Review" [Publication Type] | Func* OR functioning | „Stroke“ OR "Stroke"[Mesh] OR „Brain Injurie?“ OR „Brain Injuries“[Mesh] | „Rehabilitation“ OR "Rehabilitation"[Mesh] OR Rehab* |

human AND "Randomized Controlled Trial" [Publication Type] NOT "Review" [Publication Type] AND (Func\* OR functioning) AND ("Stroke" OR "Stroke"[Mesh] OR "Brain Injuries" OR "Brain Injuries"[Mesh] ) AND ("Rehabilitation" OR "Rehabilitation"[Mesh] OR Rehab\*)

-->1136 Ergebnisse

## Medpilot

(RCT OR "Randomized Controlled Trial" OR "Randomisierte kontrollierte Studie" OR "Clinical Trial" OR "Klinische Studie") AND (function\* OR functional OR functioning) AND (Stroke OR "Cerebrovascular accident" OR Schlaganfall OR Apoplex OR "Brain Injuries" OR "Brain Injury" OR "intracranial injury" OR "Schädel-Hirn-Trauma" OR Gehirnverletzung ) AND (rehabilitation OR rehab\*) AND DT=ARTIKEL

-->578 Ergebnisse

Medline 564  
14 nicht MEDLINE

## Cochrane Library

| ID | Search Hits                                                                   |
|----|-------------------------------------------------------------------------------|
| #1 | "randomized controlled trial":pt (Word variations have been searched) 325572  |
| #2 | functional or functioning:ti,ab,kw (Word variations have been searched) 79838 |
| #3 | MeSH descriptor: [Stroke] explode all trees 4516                              |
| #4 | stroke:ti,ab,kw (Word variations have been searched) 19119                    |
| #5 | MeSH descriptor: [Brain Injuries] explode all trees 949                       |
| #6 | "brain injury":ti,ab,kw (Word variations have been searched) 1575             |
| #7 | MeSH descriptor: [Rehabilitation] explode all trees 13023                     |
| #8 | rehab or rehabilitation:ti,ab,kw (Word variations have been searched) 9541    |
| #9 | #1 and #2 and (#3 or #4 or #5 or #6) and (#7 or #8) 781                       |

25 nicht MEDLINE

## Scopus

ScienceDirect

TITLE-ABSTR-KEY((randomi?ed controlled trial)) and TITLE-ABSTR-KEY(rehabilitation)  
and

(TITLE-ABSTR-KEY(**stroke**) or TITLE-ABSTR-KEY(**brain injury**) )  
and  
(TITLE-ABSTR-KEY(**functional**) or TITLE-ABSTR-KEY(**functioning** ))

**75** articles found for: TITLE-ABSTR-KEY(**(randomi?ed controlled trial)**) and TITLE-ABSTR-KEY(**rehabilitation**) and (**TITLE-ABSTR-KEY(stroke) or TITLE-ABSTR-KEY(brain injury)**) and (**TITLE-ABSTR-KEY(functional) or TITLE-ABSTR-KEY(functioning)**)[All Sources(Medicine and Dentistry,Nursing and Health Professions,Pharmacology, Toxicology and Pharmaceutical Science)]
